# Supplementary material for: Antibacterial and Cytotoxic Potential of Biosynthesized Silver Nanoparticles by Some Plant Extracts
Source: MDPI journal article supplement (doi:10.3390/nano8060382), 2018-05-30
Supplement: s1 [file s1]

## Supplementary Nanomaterials:

### Antibacterial and Cytotoxic Potential of Biosynthesized Silver Nanoparticles by Some Plant Extracts

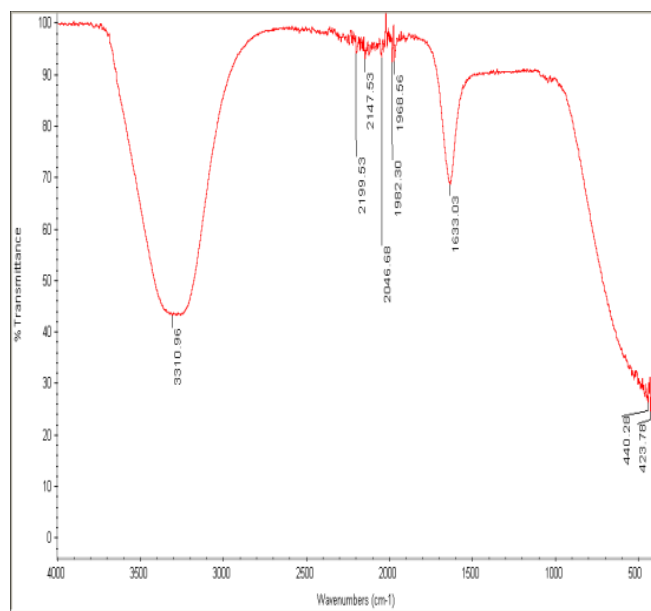

FTIR spectra synthesized silver nanoparticle by *Phoenix dactylifer* alcoholic extract

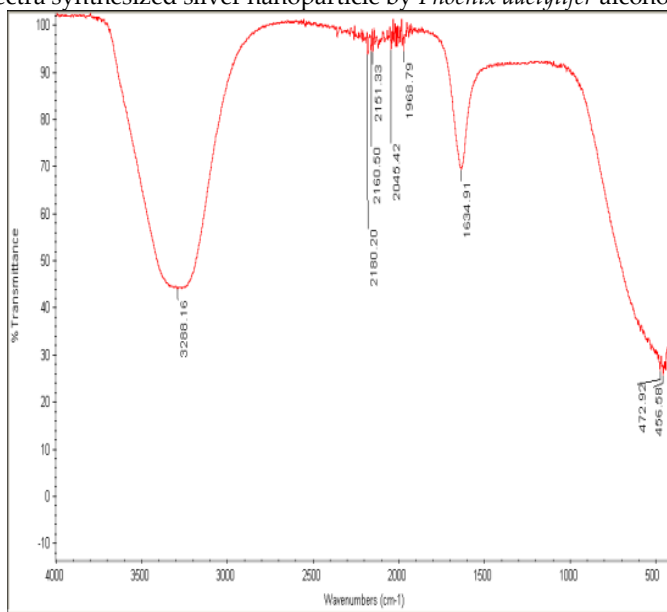

FTIR spectra synthesized silver nanoparticle by *Phoenix dactylifer* aqueous extract

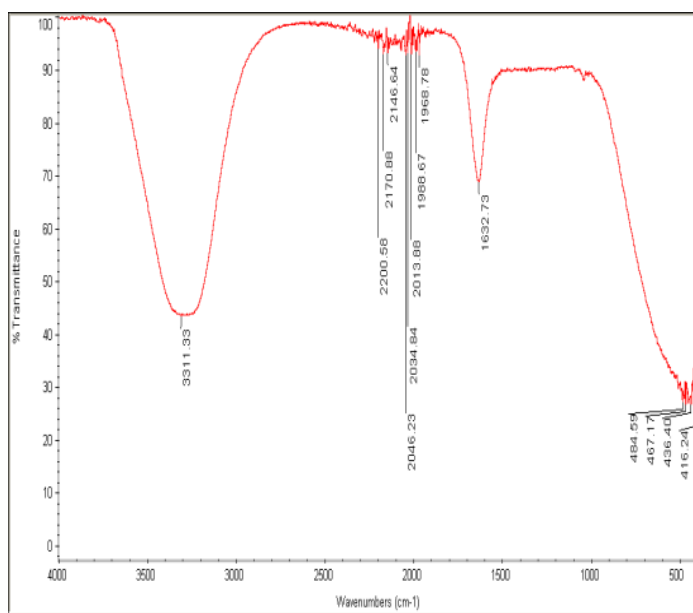

FTIR spectra synthesized silver nanoparticle by *Acacia nilotica* alcoholic extract

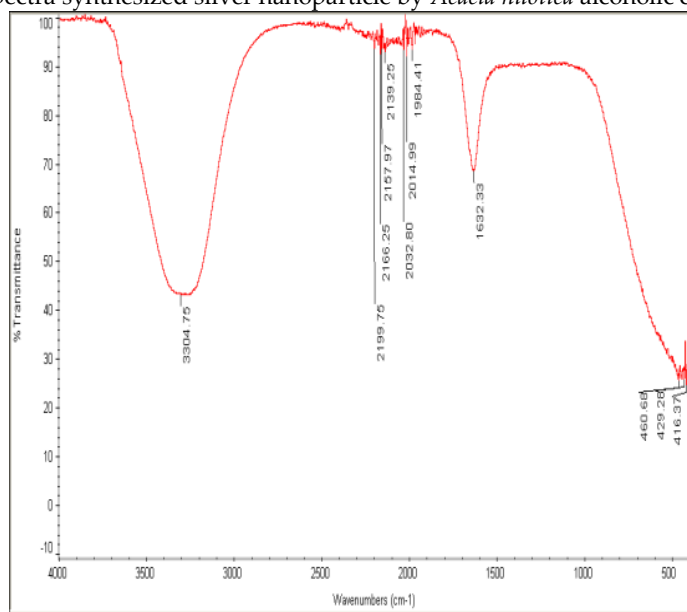

FTIR spectra synthesized silver nanoparticle by *Acacia nilotica* aqueous extract

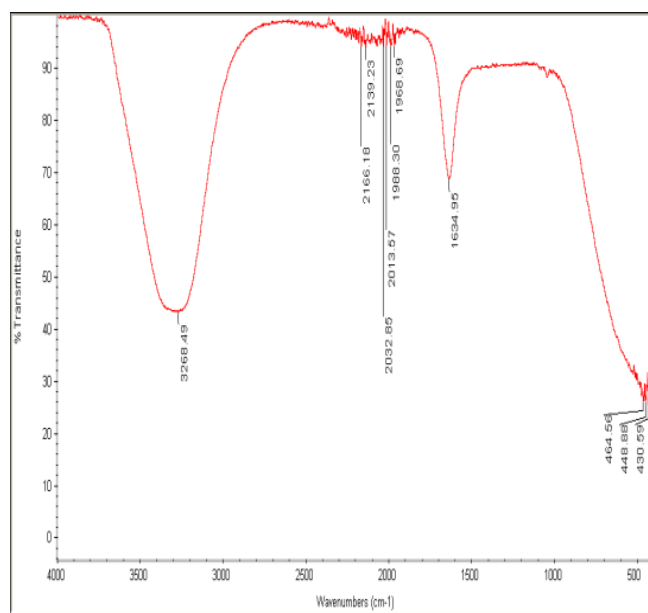

FTIR spectra synthesized silver nanoparticle by *Ferula asafetida* alcoholic extract

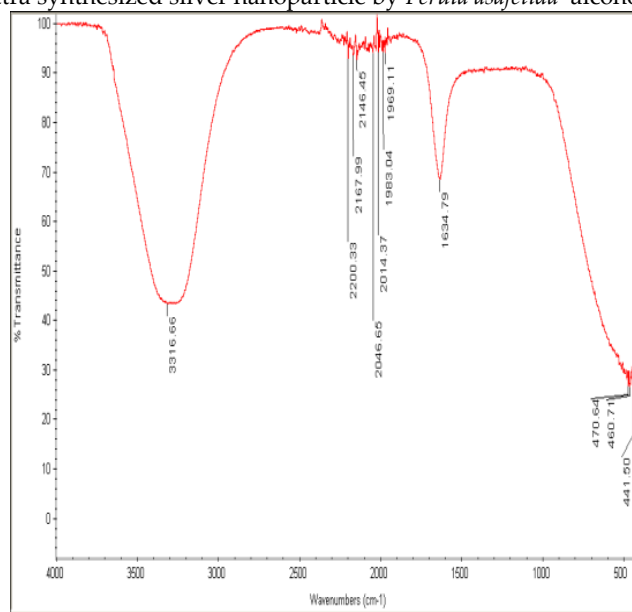

FTIR spectra synthesized silver nanoparticle by *Ferula asafetida* aqueous extract

Figure S1: FTIR spectra of synthesized silver nanoparticles by the alcoholic and aqueous extract of *Phoenix dactylifer*, *Acacia nilotica* and *Ferula asafetida*.
